# Supplementary material for: Reprogramming of regulatory network using expression uncovers sex-specific gene regulation in Drosophila
Source: PubMed Central journal article supplement (PMC6170494; doi:10.1038/s41467-018-06382-z), 2018-10-03
Supplement: 41467_2018_6382_MOESM3_ESM.pdf [file 41467_2018_6382_MOESM3_ESM.pdf]

## **Description of Additional Supplementary Files**

File Name: Supplementary Data 1

Description: Predicted female-specific GRN

File Name: Supplementary Data 2

Description: Predicted male-specific GRN
